# Supplementary material for: Soil microbial community structure and diversity are largely influenced by soil pH and nutrient quality in 78-year-old tree plantations
Source: Copernicus journal article supplement (doi:10.5194/bg-14-2101-2017), 2017-04-24
Supplement: Supplementary file 1 [file bg-14-2101-2017-supplement.pdf]

Supplement of Biogeosciences, 14, 2101–2111, 2017  
<http://www.biogeosciences.net/14/2101/2017/>  
doi:10.5194/bg-14-2101-2017-supplement  
© Author(s) 2017. CC Attribution 3.0 License.

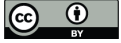

*Supplement of*

## **Soil microbial community structure and diversity are largely influenced by soil pH and nutrient quality in 78-year-old tree plantations**

**Xiaoqi Zhou et al.**

*Correspondence to:* Zhongjun Jia (jia@issas.ac.cn)

The copyright of individual parts of the supplement might differ from the CC-BY 3.0 licence.

5

Supplementary materials

10

15

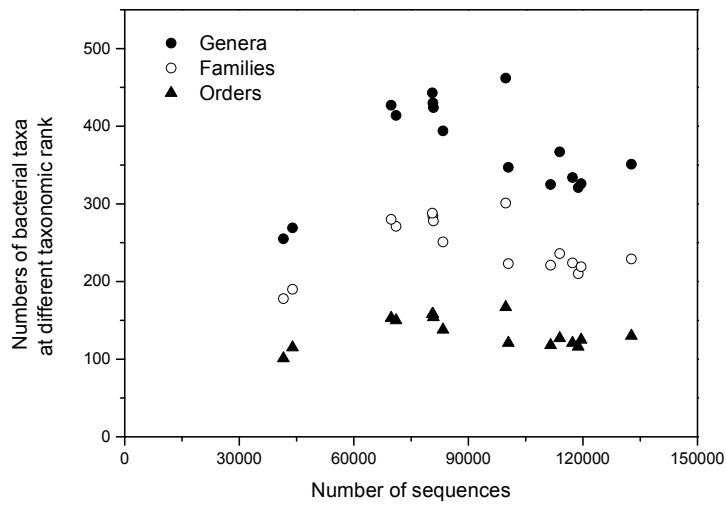

25

**Figure S1.** Number of bacterial genera, families and orders for each of the soil samples related to the total number of bacterial sequences in 78-year-old forest plantations with different tree species.

30

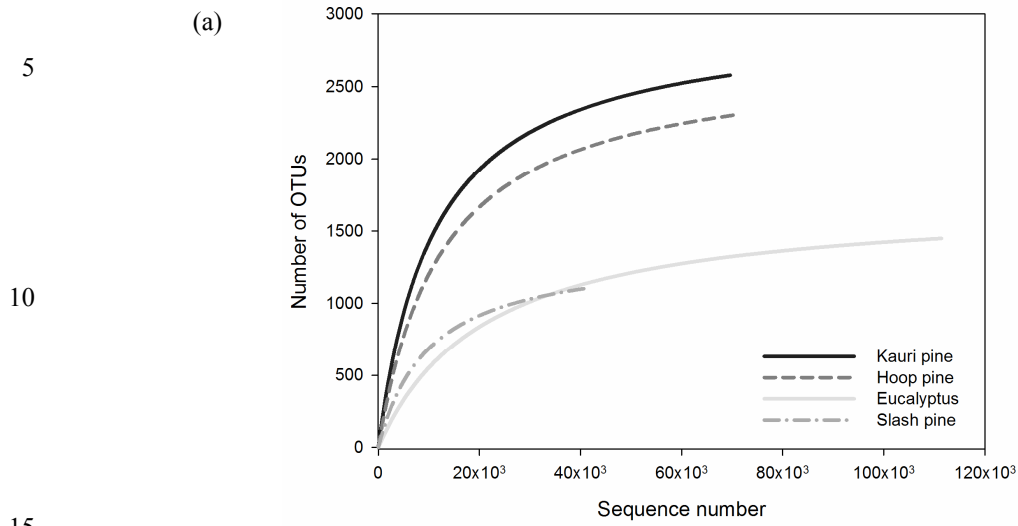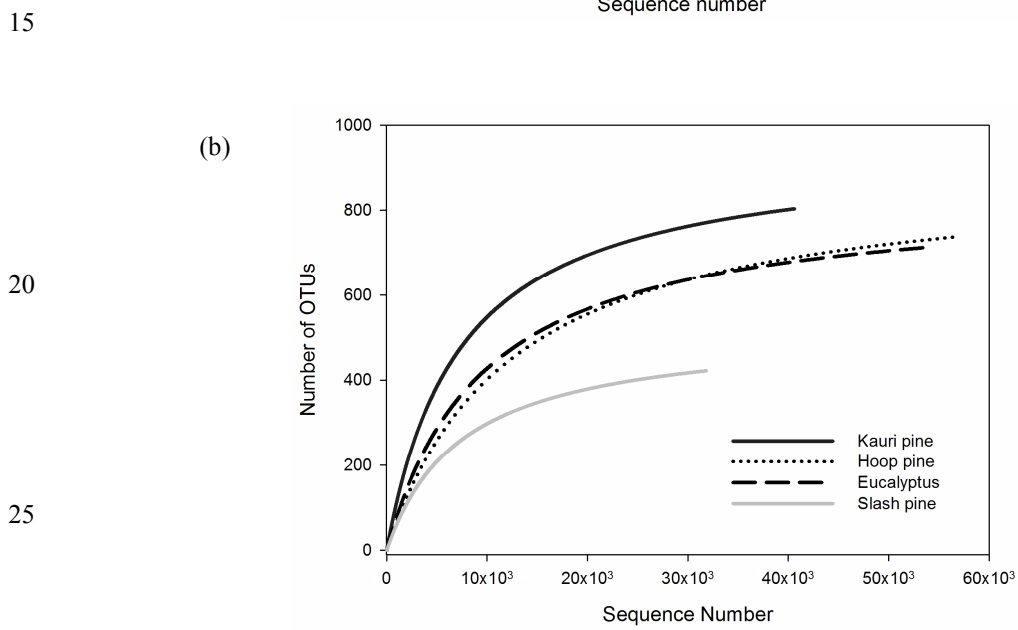

30 **Figure S2.** Rarefaction curves of soil bacteria (a) and eukaryotes (b) in 78-year-old forest plantations with different tree species. OTU, operational taxonomical unit.

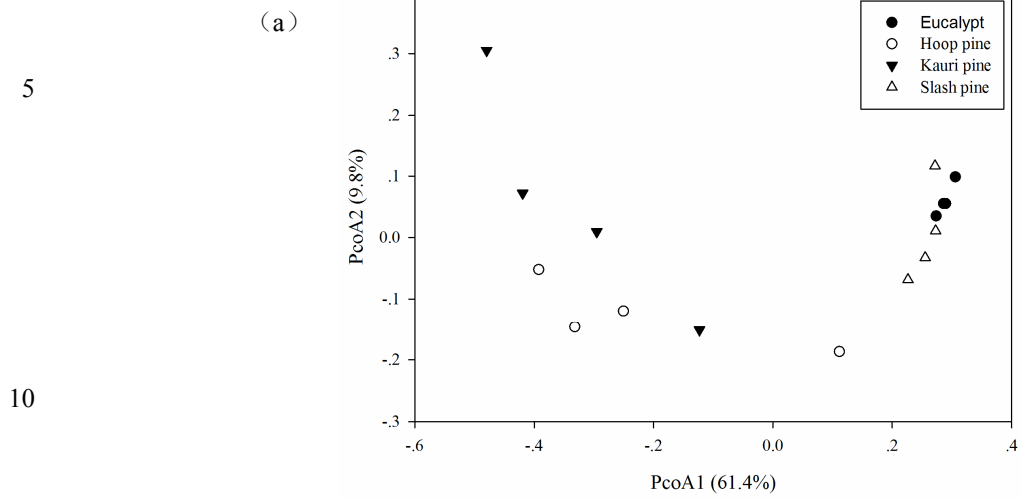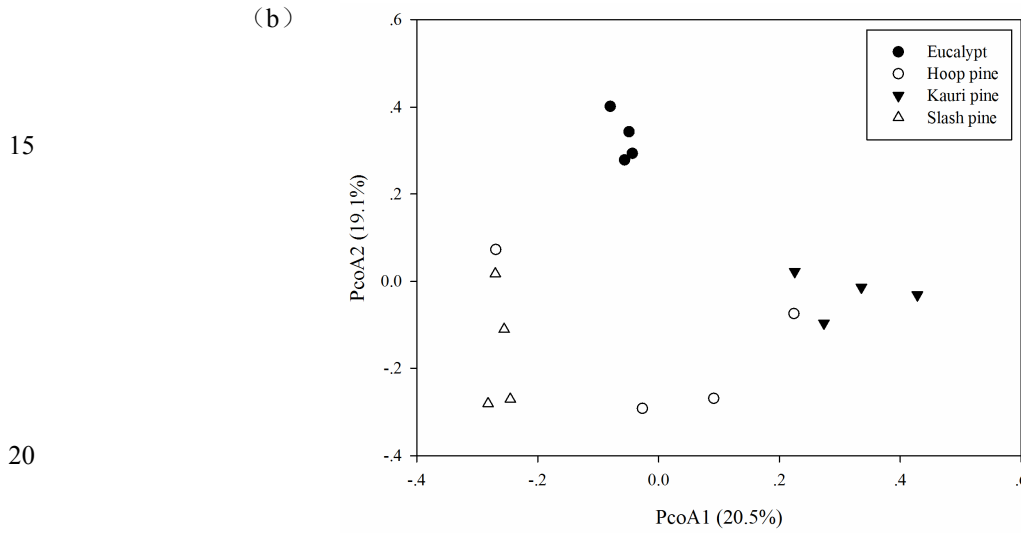

**Figure S3.** Principal component analysis (PcoA) of community structure of bacterial (a) and eukaryotic (b) phyla in soils under different tree species.
